# Supplementary material for: Flexible design in controllable synthesis of Ru catalyst toward enzymatic and electrochemical hydrogen peroxide performance
Source: Royal Society of Chemistry journal article supplement (doi:10.1039/d4nj01331j), 2024-01-01
Supplement: d4nj01331j1.pdf [file d4nj01331j1.pdf]

## Supporting Information (SI)

# Flexible-Design in Controllable Synthesis of Ru Catalyst toward Enzymatic and Electrochemical Hydrogen Peroxides Performance

Xi Hu,<sup>a,b</sup> Yujun Yang,<sup>c</sup> Yaoyang Pu,<sup>a,b</sup> and Xiang Mao <sup>\*a,b</sup>

- a. State Key Laboratory of Ultrasound in Medicine and Engineering, College of Biomedical Engineering, Chongqing Medical University, Chongqing 400016, 400016, P. R. China.  
E-mail: [maox@cqmu.edu.cn](mailto:maox@cqmu.edu.cn)
- b. Chongqing Key Laboratory of Biomedical Engineering, College of Biomedical Engineering, Chongqing Medical University, Chongqing 400016, 400016, P. R. China
- c. Key Laboratory of Laboratory Medical Diagnostics, Ministry of Education, Department of Laboratory Medicine, Chongqing Medical Laboratory Microfluidics and SPRi Engineering Research Center, Chongqing Medical University, Chongqing 400016, P. R. China

Correspond Author: E-mail: [maox@cqmu.edu.cn](mailto:maox@cqmu.edu.cn)

Xi Hu and Yujun Yang contributed equally in this work.

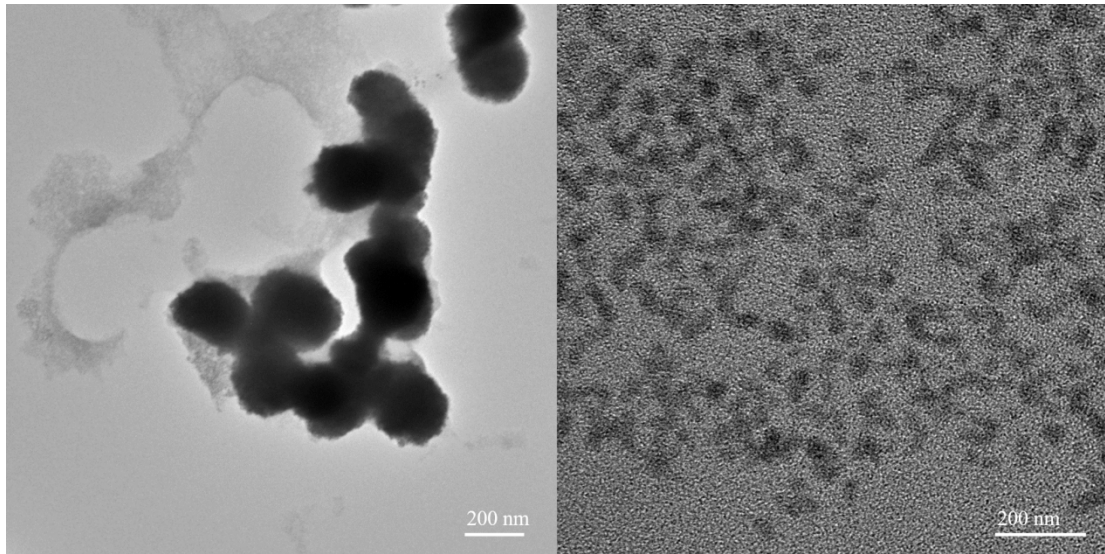

**Figure S1.** TEM images of as synthesized Ru NPs at room temperature for one hour.

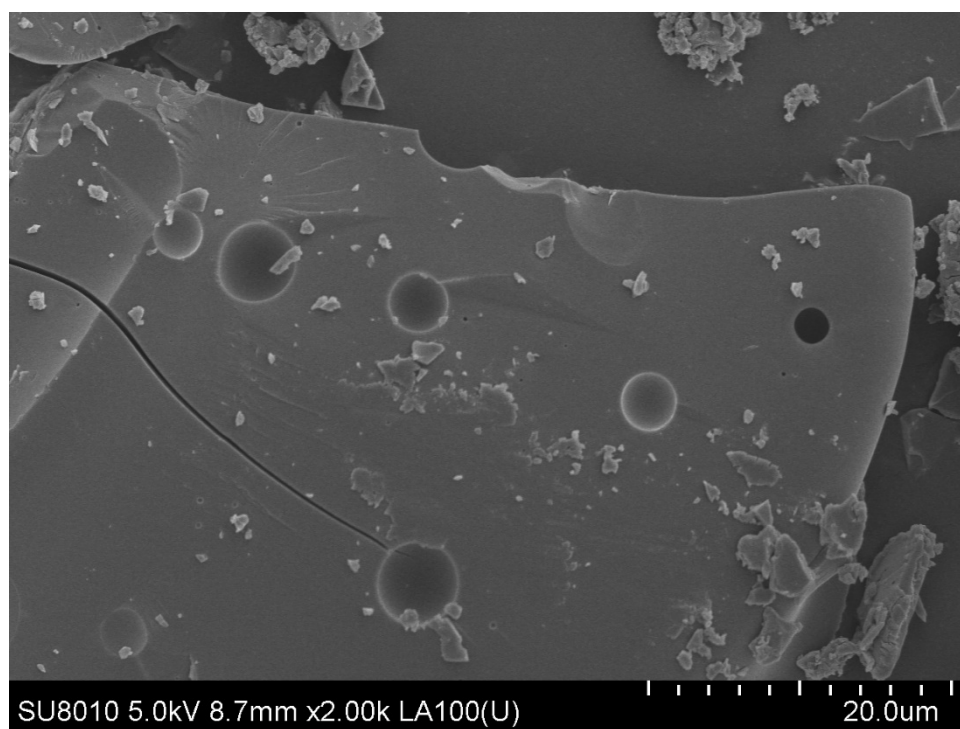

**Figure S2.** SEM image of as synthesized Ru NPs.

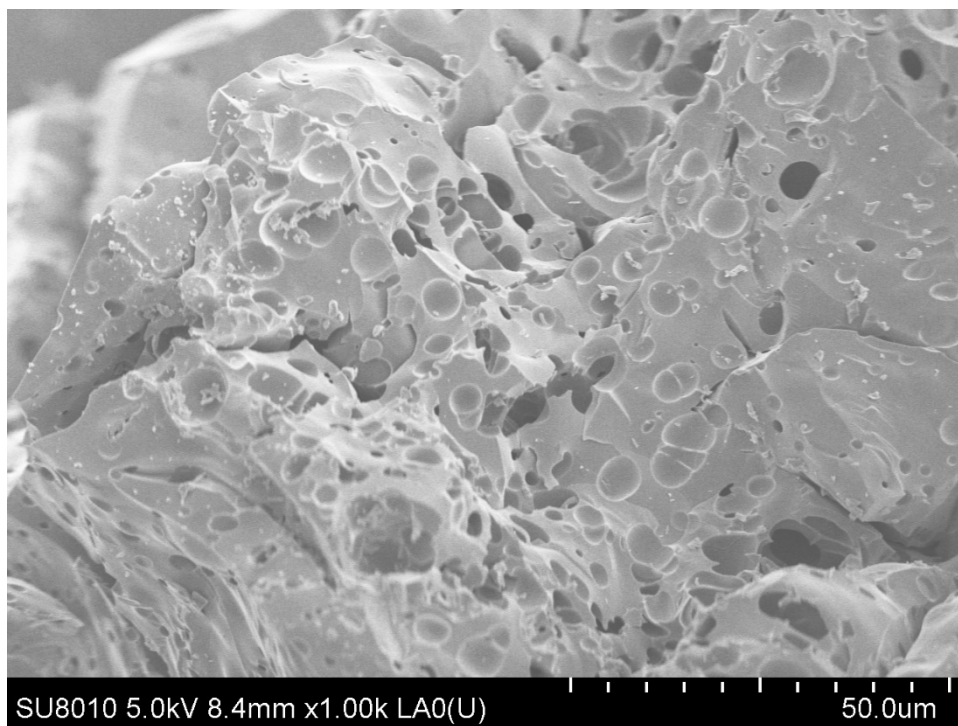

**Figure S3.** SEM image of annealed Ru NPs.

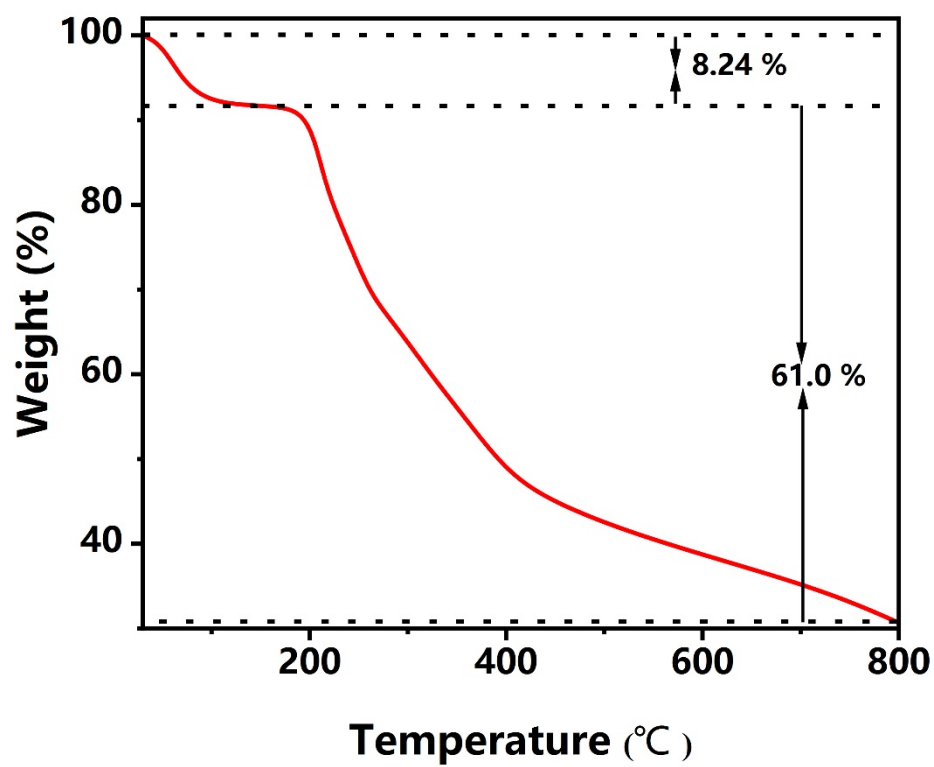

Figure S4. TGA curves of Ru NPs.

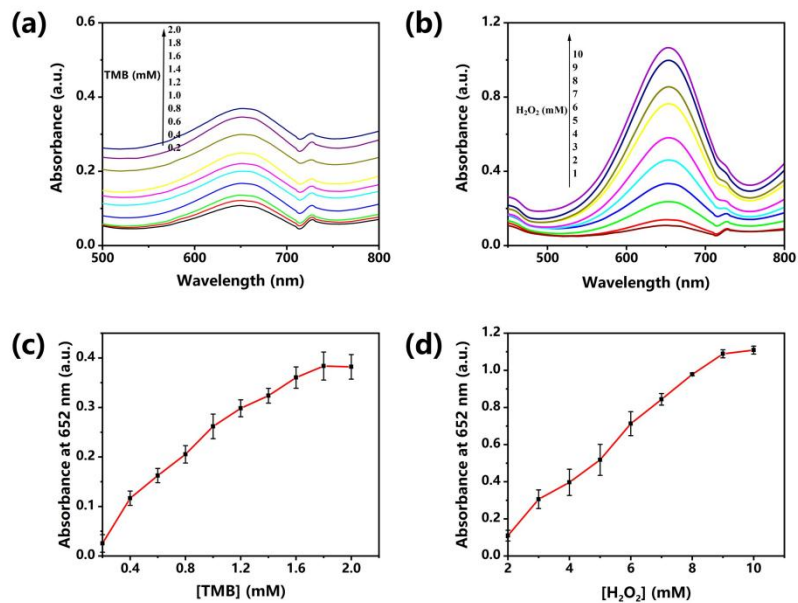

**Figure S5.** HRP-like activity of Ru NPs during oxidation of TMB. (a, c) UV-vis absorption spectra and (b, d) absorbance at 652 nm of Ru NPs ( $200 \mu\text{g mL}^{-1}$ ) incubated at different concentrations of TMB and H<sub>2</sub>O<sub>2</sub> for 10 mins.

### Supporting Information (SI)

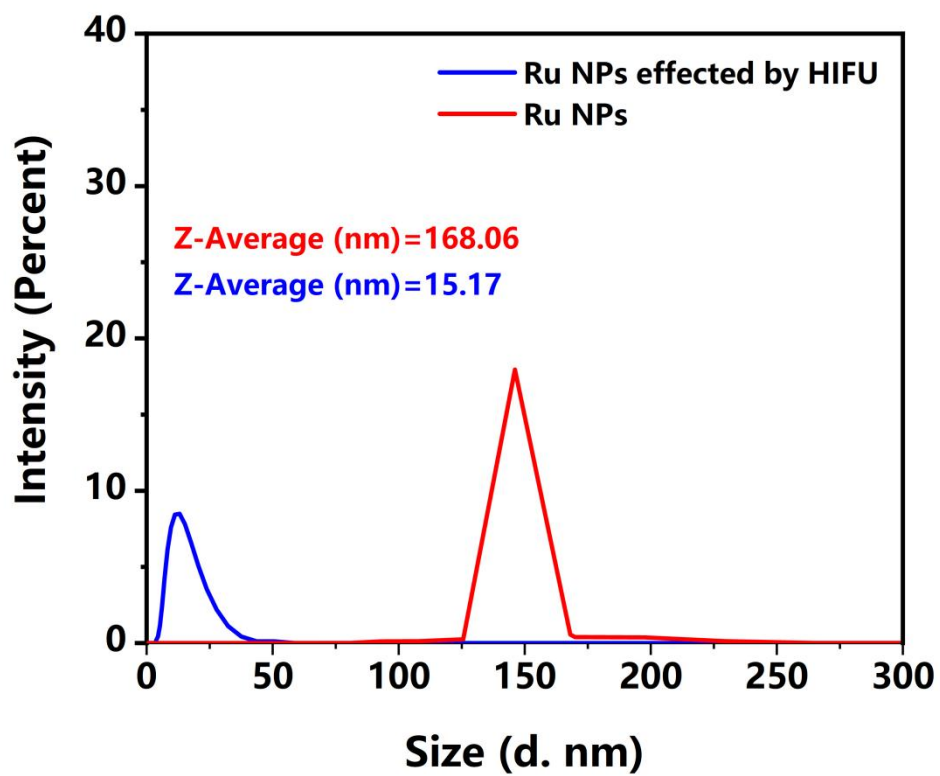

Figure S6. DLS data of Ru NPs and Ru NPs effected by HIFU (10 MPa, 4000 W).

## Supporting Information (SI)

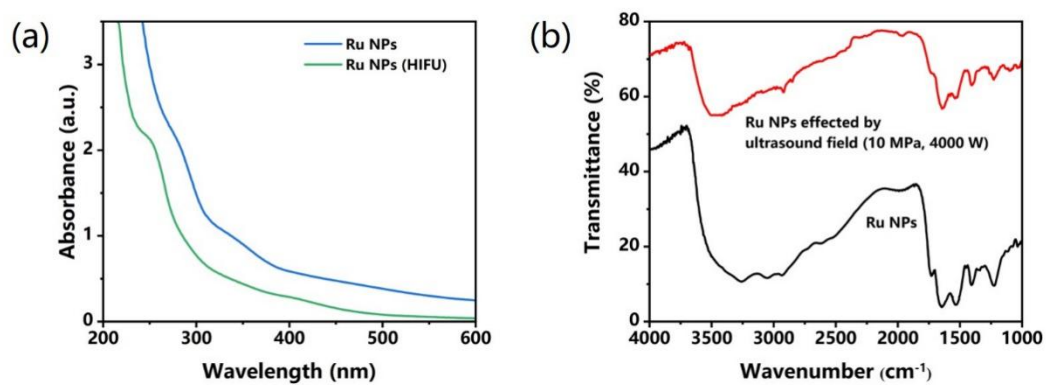

**Figure S7.** (a, b) UV-*vis* absorbance spectra and FTIR spectra of Ru NPs effected by ultrasound field (10 MPa, 4000 W).



**Table S1.** Comparison of the kinetic parameters of different catalysts.

| <b>Catalyst</b>                | <b>Substrate</b>              | <b>K<sub>m</sub> (mM)</b> | <b>V<sub>max</sub> (<math>\times 10^{-7}</math> M s<sup>-1</sup>)</b> | <b>Ref.</b> |
|--------------------------------|-------------------------------|---------------------------|-----------------------------------------------------------------------|-------------|
| HRP                            | TMB                           | 0.434                     | 1.00                                                                  | 1           |
|                                | H <sub>2</sub> O <sub>2</sub> | 3.70                      | 0.871                                                                 |             |
| Ir NPs                         | TMB                           | 0.33                      | 12.7                                                                  | 2           |
|                                | H <sub>2</sub> O <sub>2</sub> | 44.28                     | 13.7                                                                  |             |
| Pt NPs                         | TMB                           | 0.86                      | 17.4                                                                  | 2           |
|                                | H <sub>2</sub> O <sub>2</sub> | 7.92                      | 53.5                                                                  |             |
| Pt nanoplates                  | TMB                           | 0.17                      | 10.1                                                                  | 3           |
|                                | H <sub>2</sub> O <sub>2</sub> | 82.7                      | 17.7                                                                  |             |
| RuO <sub>2</sub> NPs           | TMB                           | 0.24                      | 1.9                                                                   | 4           |
|                                | H <sub>2</sub> O <sub>2</sub> | 212                       | 2.05                                                                  |             |
| Ru NPs                         | TMB                           | 0.234                     | 4.95                                                                  | 5           |
|                                | H <sub>2</sub> O <sub>2</sub> | 2.206                     | 34.96                                                                 |             |
| Ru frames                      | TMB                           | 0.0603                    | 1.34                                                                  | 6           |
|                                | H <sub>2</sub> O <sub>2</sub> | 318                       | 0.741                                                                 |             |
| Co <sub>3</sub> O <sub>4</sub> | TMB                           | 0.36                      | 2.49                                                                  | 7           |
|                                | H <sub>2</sub> O <sub>2</sub> | 6.53                      | 130                                                                   |             |
| Fe <sub>3</sub> O <sub>4</sub> | TMB                           | 0.098                     | 0.344                                                                 | 1           |
|                                | H <sub>2</sub> O <sub>2</sub> | 154                       | 0.978                                                                 |             |

**Table S2.** Comparison of the detection H<sub>2</sub>O<sub>2</sub> of different catalysts.

| <b>Probe</b>                                        | <b>Linear range(<math>\mu\text{M}</math>)</b> | <b>LOD (<math>\mu\text{M}</math>)</b> | <b>Ref.</b> |
|-----------------------------------------------------|-----------------------------------------------|---------------------------------------|-------------|
| Ru NPs                                              | 500-100000                                    | 1.45                                  | This work   |
| Ag/graphene oxide                                   | 100-20000                                     | 1.9                                   | 8           |
| Pt/carbon nanotube                                  | 5-25000                                       | 1.5                                   | 9           |
| FePPOPs-SO <sub>3</sub> H                           | 50-1800                                       | 26.7                                  | 10          |
| Au/Co <sub>3</sub> O <sub>4</sub> -CeO <sub>x</sub> | 10-1000                                       | 5.29                                  | 11          |
| PtPd-Fe <sub>3</sub> O <sub>4</sub> /C              | 0.02-67                                       | 0.005                                 | 12          |

## References

1. L. Gao, J. Zhuang, L. Nie, J. Zhang, Y. Zhang, N. Gu, T. Wang, J. Feng, D. Yang, S. Perrett, and X. Yan, *Nat Nanotechnol.*, 2007, 2, 577-583.
2. X. Wang, L. Qin, M. Zhou, Z. Lou, and H. Wei, *Anal. Chem.*, 2018, 90, 11696-11702.
3. H. Choi, S. E. Son, W. Hur, V. K. Tran, H. B. Lee, Y. Park, D. K. Han, and G. H. Seong, *Sci. Rep.*, 2020, 10, 9513.
4. H. Deng, W. Shen, Y. Peng, X. Chen, G. Yi, and Z. Gao, *Chemistry*, 2012, 18, 8906-8911.
5. L. He, Y. Li, Q. Wu, D. M. Wang, C. M. Li, C. Z. Huang, and Y. F. Li, *ACS Appl. Mater. Interfaces*, 2019, 11, 29158-29166.
6. H. Ye, J. Mohar, Q. Wang, M. Catalano, M. J. Kim, and X. Xia, *Sci. Bull.*, 2016, 61, 1739-1745.
7. J. Dong, L. Song, J. J. Yin, W. He, Y. Wu, N. Gu, and Y. Zhang, *ACS Appl. Mater. Interfaces*, 2014, 6, 1959-1970.
8. W. Lu, G. Chang, Y. Luo, F. Liao, and X. Sun, *J. Mater. Sci.*, 2011, 46, 5260-5266.
9. Z. Wen, S. Ci, and J. Li, *J. Phys. Chem. C*, 2009, 113, 13482-13487.
10. T. Liu, J. Tian, L. Cui, Q. Liu, L. Wu, and X. Zhang, *Colloids Surf. B Biointerfaces*, 2019, 178, 137-145.
11. H. Liu, Y. Ding, B. Yang, Z. Liu, Q. Liu, and X. Zhang, *Sens. Actuators B*, 2018, 271, 336-345.
12. X. Sun, S. Guo, Y. Liu, and S. Sun, *Nano Lett.*, 2012, 12, 4859-4863.
